## **Nepriylisin-sensitive amyloidogenic A $\beta$ versus IDE-sensitive soluble A $\beta$ : a probable mechanistic cause for sporadic Alzheimer's disease**

Hiroki Sasaguri<sup>1,+,\*</sup>, Risa Takamura<sup>1,2,+</sup>, Naoto Watamura<sup>1</sup>, Naomasa Kakiya<sup>1</sup>, Toshio Ohshima<sup>2</sup>, Ryo Fujioka<sup>1</sup>, Naomi Yamazaki<sup>1</sup>, Misaki Sekiguchi<sup>1</sup>, Kaori Iwata<sup>3</sup>, Yukio Matsuba<sup>1</sup>, Shoko Hashimoto<sup>1</sup>, Satoshi Tsubuki<sup>1</sup>, Takashi Saito<sup>1,3,4,5</sup>, Nobuhisa Iwata<sup>3,\*</sup>, Takaomi C. Saido<sup>1,\*</sup>

<sup>1</sup>Laboratory for Proteolytic Neuroscience, RIKEN Center for Brain Science, 2-1 Hirosawa, Wako, Saitama 351-0198, Japan

<sup>2</sup>Laboratory for Molecular Brain Science, Department of Life Science and Medical Bioscience, Waseda University, Shinjuku, Tokyo 162-8480, Japan

<sup>3</sup>Department of Genome-based Drug Discovery & Unit for Brain Research, Graduate School of Biomedical Sciences, Nagasaki University, Nagasaki, 852-8521, Japan

<sup>4</sup>Department of Neurocognitive Science, Institute of Brain Science, Nagoya City University Graduate School of Medical Sciences, Nagoya, Aichi 467-8601, Japan

<sup>5</sup>Department of Neuroscience and Pathobiology, Research Institute of Environmental Medicine, Nagoya University, Nagoya, Aichi 464-8601, Japan

<sup>+</sup>These authors contributed equally.

<sup>\*</sup>Corresponding authors:

[hiroki.sasaguri.riken@jp](mailto:hiroki.sasaguri.riken@jp); [iwata-n@nagasaki-u.ac.jp](mailto:iwata-n@nagasaki-u.ac.jp); [takaomi.saido@riken.jp](mailto:takaomi.saido@riken.jp)

## Abstract

Neprilysin (NEP) and insulin-degrading enzyme (IDE) are considered the two major catabolic enzymes that degrade amyloid  $\beta$  peptide ( $A\beta$ ), the primary cause of Alzheimer's disease (AD). However, their roles in  $A\beta$  metabolism *in vivo* have never been compared in an impartial and side-by-side manner. Here, we crossbred single *App* knock-in mice with NEP (*Mme*) KO mice and with IDE (*Ide*) KO mice to generate double mutants that were analyzed for their biochemical and  $A\beta$  pathology properties. We found that NEP is responsible for the metabolism of amyloidogenic insoluble  $A\beta$  whereas IDE affects soluble  $A\beta$ . A deficiency of NEP, but not of IDE, augmented the formation of  $A\beta$  plaques, dystrophic neurites, and astrocytic and microglial activation, all of which are key pathological events in the development of AD. In addition, a deficiency of NEP had no significant impact on the levels of various neuropeptides (somatostatin, substance P, cholecystokinin, and neuropeptide Y), well known to be *in vitro* substrates for NEP, presumably because NEP is expressed in secretory vesicles and on the presynaptic membranes of excitatory neurons while most if not all neuropeptides are secreted from inhibitory neurons. This argues against the concern that NEP up-regulation for treatment of preclinical AD would reduce the levels of these neuropeptides. These findings indicate that NEP relatively selectively degrades  $A\beta$  in the brain. Whereas familial AD (FAD) is unambiguously caused by an increased anabolism of  $A\beta$ , and of  $A\beta_{42}$  and  $A\beta_{43}$  in particular, the anabolism of  $A\beta$  appears unaffected before its deposition in the brain that subsequently leads to the onset of sporadic AD (SAD). These observations thus suggest that NEP-sensitive amyloidogenic  $A\beta$  likely plays a primary pathogenic role in the etiology of SAD. Our findings are consistent with the aging-dependent decline of NEP expression in human brain and with recent genome-wide association studies (GWAS) indicating that variants of the gene encoding NEP (*MME*) are associated with the risk of SAD development. Taken together, our results imply that the aging-associated decrease in NEP expression is a primary cause of SAD and could thus be a target for the treatment of preclinical AD once other factors such as apolipoprotein E genotypes have also been considered.

## Introduction

Alzheimer's disease (AD) is the major cause of dementia that deprives patients of their quality of life and dignity as the disease progresses. A large body of pathological and genetic evidence has established that the deposition of amyloid  $\beta$  peptide ( $A\beta$ ) in the brain serves as a primary cause of this disorder and precedes the onset of fully developed AD by more than two decades<sup>1,2</sup>. While familial AD (FAD) is unambiguously caused by the increased anabolism of  $A\beta$  (in particular  $A\beta_{42}$  and  $A\beta_{43}$ ), the mechanisms underlying  $A\beta$  accumulation in the etiology of sporadic AD (SAD) remain elusive. Because proteostasis is principally governed by the balance between anabolism and catabolism, and given that the anabolism of  $A\beta$  appears unaffected prior to the  $A\beta$  deposition that leads to SAD development, a plausible candidate cause of SAD is a decrease in  $A\beta$  catabolism<sup>3,4</sup>. This notion led us to identify neprilysin (NEP) as a major  $A\beta$ -degrading enzyme *in vivo*,<sup>5,6</sup> while the group led by Selkoe identified insulin-degrading enzyme (IDE) as a contributing factor<sup>7-9</sup>. From these findings it became commonplace for expression levels of these proteases to be quantified when examining the anabolism, clearance, or changes in  $A\beta$  *in vitro* or *in vivo* to ensure that catabolic mechanisms remained unaltered. However, as the quantitative and pathophysiological roles of NEP and IDE in *in vivo*  $A\beta$  catabolism have never been studied in an unbiased and side-by-side manner, we address this point in a series of animal experiments presented here.

To begin with, we make a clear distinction between two types of  $A\beta$  that are present in the brains of mutant mouse models of AD. The first can be solubilized by Tris-saline (TS) after homogenization and ultracentrifugation and is referred to as soluble  $A\beta$ ; the second requires a denaturing reagent, guanidine hydrochloride (GuHCl), for solubilization and is thus termed insoluble  $A\beta$ . This second type enhances  $A\beta$  amyloidosis *in vivo* and is referred to as being 'amyloidogenic' (see **Results**). In the present study, we used *Mme* KO mice<sup>10</sup>, which are deficient in NEP expression, and *Ide* KO mice<sup>8</sup>, which are deficient in IDE expression, and crossbred them with *App* knock-in mice, *App*<sup>NL-F/NL-F</sup> that overproduce wild-type human  $A\beta_{1-42}$  without overexpressing amyloid precursor protein (APP) or APP/presenilin 1 (PS1)<sup>11,12</sup>. The effect of NEP deficiency and that of IDE deficiency on AD-related pathological features were surprisingly different from each other in these animals. NEP deficiency resulted in a selective, significant increase in insoluble (amyloidogenic)  $A\beta$  but not in soluble  $A\beta$  as confirmed in biochemical and pathology analyses. On the other hand, a deficiency in IDE led to a specific increase in soluble  $A\beta_{40}$ . Consequently, a NEP deficiency exacerbated  $A\beta$  amyloidosis and was associated with dystrophic neurites, loss of synaptic markers and inflammatory responses, whereas IDE deficiency exerted essentially no pathological effects. These findings support the notion that NEP is a primary  $A\beta$ -degrading enzyme both under physiological and pathological conditions.

When we showed that gene therapy utilizing NEP activity attenuated  $A\beta$  pathology in APP-

transgenic mice<sup>13-15</sup> and that the neuropeptide somatostatin regulated neuronal A $\beta$  levels *in vitro* and *in vivo*<sup>16-19</sup>, interest within the academic and pharmaceutical industry fields rose significantly given the prospects of applying pharmacological intervention via the somatostatin-NEP pathway to suppress A $\beta$  pathology<sup>20-23</sup> and thus inhibit or delay the progression of preclinical AD. This concept was consistent with the aging-dependent reduction and oxidative inactivation of neprilysin,<sup>24-27</sup> along with the disappearance of somatostatin with aging and in AD<sup>28,29</sup>, all of which would lead to accelerated A $\beta$  deposition. Finally, while recent GWAS indicated an association of *MME* gene variants with the incidence of AD<sup>30,31</sup>, to our knowledge there has been no such relationship reported between the *IDE* gene and risk of AD.

Some concerns have been raised in the scientific literature about modulating NEP activity to treat preclinical AD due to postulated effects on the levels of various other neuropeptides present in the central nervous system (CNS): NEP was originally described as a peptidase that degraded neuropeptides *in vitro* by biochemical means<sup>32-34</sup>. We thus examined the levels of representative CNS neuropeptides such as somatostatin, substance P, cholecystokinin, and neuropeptide Y in *Mme* KO mouse brains and unexpectedly found that a deficiency of NEP did not elevate these neuropeptides in the CNS, but did result in a doubling of endogenous A $\beta$  levels<sup>6</sup>. This observation agreed with an early report showing that enkephalin levels remained unchanged in the cerebral cortices of *Mme* KO mice<sup>35</sup>, and occurs presumably because NEP degrades A $\beta$  in secretory vesicles and at presynaptic membranes of excitatory neurons<sup>26,36,37</sup>. Furthermore, the aforementioned neuropeptides are generally produced and secreted from inhibitory neurons<sup>38-41</sup>, thereby accounting for discrepancies between *in vivo* and *in vitro* observations. Now that we are aware of the involvement of somatostatin receptor subtypes 1 and 4 in neprilysin-catalyzed A $\beta$  regulation<sup>17</sup>, our findings together point to a G protein-coupled receptor (GPCR)-based strategy for the generation of low molecular weight, disease-modifying medications to treat preclinical AD, which would be much less expensive and likely to be safer than immunotherapies.

## Results

### A $\beta$ profiles in the brains of *Mme* and *Ide* KO mice

To evaluate the roles of NEP and IDE in the physiological degradation of A $\beta$  *in vivo*, we compared A $\beta$  profiles in the brains of single *Mme* KO (NEP-deficient) and *Ide* KO (IDE-deficient) mice by Enzyme-Linked Immunosorbent Assay (ELISA) (**Figure 1**). The *Mme* KO mice showed 1.5-, 1.8- and 1.6-fold increases in TS-soluble A $\beta$ <sub>42</sub>, GuHCl-soluble A $\beta$ <sub>40</sub> and A $\beta$ <sub>42</sub>, respectively (**Figure 1a,b,d,e**). In contrast, the quantity of TS-soluble A $\beta$ <sub>40</sub> and A $\beta$ <sub>42</sub> significantly increased by 5.6- and 2.1-fold, respectively, in *Ide* KO mice (**Figure 1a,d**) whereas the GuHCl-soluble A $\beta$ <sub>40</sub> and A $\beta$ <sub>42</sub> fractions remained unchanged (**Figure 1b,e**). It is noteworthy that the quantity of GuHCl-soluble A $\beta$  was

approximately 10 times greater than that of TS-soluble A $\beta$  in wild-type brains. The total amount of A $\beta_{40}$  and A $\beta_{42}$  increased significantly in *Mme* KO mice, whereas the total A $\beta_{40}$  content in *Ide*-KO mice increased only marginally (**Figure 1c, f**). For the A $\beta_{42}$ /A $\beta_{40}$  ratio, both mouse lines showed similar profiles (**Figure 1g-i**). A deficiency of NEP or IDE decreased the A $\beta_{42}$ /A $\beta_{40}$  ratio in TS-soluble fractions but did not affect those in GuHCl and total fractions. These results indicate that IDE mainly targets TS-soluble A $\beta$ , whereas NEP can degrade insoluble A $\beta$  species that account for the majority of CNS A $\beta$  accumulation *in vivo*.

### Processing of APP in *Mme* and *Ide* KO mice

We next examined APP processing in *Mme* and *Ide* KO mice. APP is first cleaved either by  $\alpha$ -secretase or  $\beta$ -secretase (a type I transmembrane aspartic protease also termed  $\beta$ -site APP-cleaving enzyme 1 or BACE1) to produce the C terminal fragments (CTFs), CTF- $\alpha$  and CTF- $\beta$ , respectively<sup>42</sup>. There was no significant difference in the amounts of full-length APP or APP CTFs in wild-type mice, *Mme* or *Ide* KO mice (**Figure 2a**), indicating that a deficiency of NEP or IDE did not affect the production or  $\alpha/\beta$ -secretase-mediated processing of APP. The amount of NEP protein in *Ide* KO mice was, however, significantly increased (**Figure 2a,b**). Because the APP intracellular domain (AICD) transcriptionally regulates *Mme* gene expression<sup>43-47</sup> and given that both IDE and AICD are mainly localized in the cytoplasm, it is possible that the increased NEP level in *Ide* KO mice was caused by an increase in AICD. In contrast, the level of IDE was markedly decreased in *Mme* KO mice (**Figure 2a,c**); while the mechanism for this remains unclear, it may account for the elevation of TS-soluble A $\beta$  in *Mme* KO mice in a manner similar to that of *Ide* KO mice (**Figure 1a,d,g**).

### Effects of NEP and IDE deficiency on the A $\beta$ amyloidosis in *App* knock-in mice

To elucidate the roles of NEP and IDE in the pathophysiology of AD, we crossbred *Mme* and *Ide* KO mice with *App*<sup>NL-F/NL-F</sup> mice<sup>11</sup>, the latter of which harbor the Swedish (KM670/671NL)<sup>48</sup> and Beyreuther/Iberian (I716F)<sup>49</sup> mutations in the endogenous mouse *App* gene, and recapitulate typical A $\beta$  pathology and neuroinflammation in brain tissue from approximately 8 months of age. We used ELISA to quantify TS- and GuHCl-soluble A $\beta$  in 12-month-old mice and found that a deficiency of NEP or IDE in *App*<sup>NL-F/NL-F</sup> mice changed the A $\beta$  profiles to patterns similar to those seen in the single *Mme* and *Ide* KO mice (**Figures 1 and 3**). These findings indicate that NEP and IDE play analogous roles both under physiological and pathological conditions. *App*<sup>NL-F/NL-F</sup> X *Mme* KO mice showed a significant increase of GuHCl-soluble A $\beta_{40}$  and A $\beta_{42}$  (**Figure 3a,b,d,e**), whereas *App*<sup>NL-F/NL-F</sup> X *Ide* KO mice exhibited an increase in TS-soluble A $\beta_{40}$  and A $\beta_{42}$ , although the increase in TS-soluble A $\beta_{42}$  was not statistically significant. The total amount of A $\beta_{40}$  and A $\beta_{42}$  increased significantly only in the *App*<sup>NL-F/NL-F</sup> X *Mme* KO mice (**Figure 3c, f**). This observation is consistent with a previous report showing that IDE degrades A $\beta$  monomer but not oligomer species<sup>50</sup>. A deficiency of IDE in *App*<sup>NL-</sup>

*F/NL-F* mice tended to decrease the A $\beta$ <sub>42</sub>/A $\beta$ <sub>40</sub> ratio in TS-soluble fractions although this was not statistically significant (**Figure 3g-i**). In contrast, the A $\beta$ <sub>42</sub>/A $\beta$ <sub>40</sub> ratio in GuHCl fractions and total fractions was not affected in either of these lines. These results confirm that IDE primarily targets TS-soluble A $\beta$ , whereas NEP degrades more insoluble A $\beta$  species as well as under pathological conditions. Gel filtration analyses of each soluble fraction indicated that deficiencies both in NEP and IDE induced the generation primarily of the A $\beta$ <sub>42</sub> monomer along with relatively small quantities of dimer, trimer and tetramer species (**Supplementary Figure 1**), the profiles of which did not differ between *Mme* KO and *Ide* KO mice crossbred with *App* knock-in mice. These observations indicate that soluble A $\beta$  oligomer species constitute a very minor proportion of overall A $\beta$  *in vivo* even under pathological conditions.

### Neuropathology of *App*<sup>NL-F/NL-F</sup> X *Mme* KO and *App*<sup>NL-F/NL-F</sup> X *Ide* KO mice

Next, we evaluated the roles of NEP and IDE in the AD pathology expressed by our animal models. We performed immunohistochemical analyses of A $\beta$  in brain slices and found that a lack of IDE did not affect A $\beta$  plaque load, whereas a deficiency of NEP significantly exacerbated the A $\beta$  pathology both in the cortex and hippocampus (**Figure 4a,b**). Neuroinflammation induced by activated astrocytes and microglia surrounding amyloid plaques manifests as one of the main pathological features in AD patients and AD mouse models<sup>11,30</sup>. We analyzed the neuroinflammatory status of *App*<sup>NL-F/NL-F</sup> X *Mme* KO and *App*<sup>NL-F/NL-F</sup> X *Ide* KO mice by immunofluorescence using antibodies against astrocytes (GFAP) and microglia (Iba1) (**Figure 5a-c**). *App*<sup>NL-F/NL-F</sup> X *Mme* KO mice showed increased astrocytosis and microgliosis in the cortex, whereas in *App*<sup>NL-F/NL-F</sup> X *Ide* KO mice the extent of neuroinflammation was comparable to that of *App*<sup>NL-F/NL-F</sup> mice. This finding indicates that neuroinflammation in AD is mainly induced by GuHCl-soluble A $\beta$  rather than TS-soluble A $\beta$  species. In addition, we detected similar losses of synaptophysin and PSD95 immunoreactivities in the vicinity of A $\beta$  plaques compared to those observed in our previous AD mouse models<sup>11</sup> (**Figure 5d,e**). Taken together, our results reveal that NEP mainly degrades A $\beta$  species with low solubility and affecting AD-related neuropathology, while IDE targets soluble A $\beta$  *in vivo* that does not affect such pathological features.

### Neuropeptide profiles in *Mme* KO mice

Our results raised the possibility that NEP could be targeted – by increasing its expression or activity – to reduce GuHCl-soluble A $\beta$  or amyloid plaques in preclinical AD. However, NEP has been reported to also degrade neuropeptides as well as A $\beta$  in the CNS<sup>4,32</sup>. To evaluate the effect of NEP on the neuropeptide levels *in vivo*, we performed immunohistochemistry against somatostatin, substance P, cholecystokinin, and neuropeptide Y in single *Mme*-KO mice (**Figure 6** and **Supplementary Figures 2-5**). We confirmed that a deficiency of NEP did not alter the levels of neuropeptides except for that

of somatostatin in the subiculum, where a small but significant reduction was seen (**Figure 6**). In any case, NEP deficiency did not induce an increase in neuropeptide levels, suggesting that the pharmacological up-regulation of NEP activity to reduce brain A $\beta$  would not induce side effects caused by reduced neuropeptide levels.

### Memory impairment in single *Mme* KO mice

We considered that it would be interesting to compare levels of cognition between *App*<sup>NL-F/NL-F</sup> X *Mme* KO and *App*<sup>NL-F/NL-F</sup> X *Ide* KO mice as this might provide information on whether the NEP-sensitive or IDE-sensitive A $\beta$  is more neurotoxic. We however found that single *Mme* KO mice exhibited significant memory impairment at 6 months of age as detected by a fear conditioning test (**Supplementary Figure 6**). This fact makes it difficult to assess the cognitive status of these double mutant mice in an unbiased manner, although the pathological features of the *Mme* KO mouse line (i.e., enhanced amyloidosis and neuroinflammation (**Figure 5**)), which were shown in a number of studies to be associated with memory impairment<sup>11,51-54</sup>, suggest that NEP-sensitive amyloidogenic A $\beta$  rather than IDE-sensitive soluble A $\beta$  is principally responsible for the neurotoxicity present *in vivo*.

### Discussion

Two decades have passed since we demonstrated that NEP is one of the major physiological A $\beta$ -degrading enzymes<sup>5,6</sup>. A mathematical formulation, based on the rate constants for anabolism, catabolism, and clearance (to cerebral spinal fluid/plasma) of A $\beta$ , indicated that NEP activity would account for around 50 % of all catabolism/clearance mechanisms given that a deficiency of NEP led to an approximately 2-fold increase in A $\beta$  levels *in vivo*<sup>3</sup>. It is notable that just a 50% increase in A $\beta$  production results in early A $\beta$  deposition in some cases of FAD and Down's syndrome<sup>2</sup>, implying that a 50% reduction of NEP expression/activity, which increase endogenous brain A $\beta$  levels 1.5-fold<sup>6</sup>, can cause pathological A $\beta$  deposition leading to AD development. Our present study showed that NEP is responsible not only for physiological A $\beta$  metabolism but also for pathological A $\beta$  metabolism. During these past decades, a large body of genetic, pathological and molecular biological evidence has established empirical roles for neuroinflammation in the pathogenesis of AD<sup>31,55-57</sup>. Consistently, using single *App* knock-in mice we have shown that the NEP-sensitive amyloidogenic A $\beta$  was closely associated with neuroinflammation (**Figure 5**). Given that recent GWAS outcomes implied a close association between *MME* gene variants and AD incidence<sup>30,31</sup>, NEP now stands as one of the key players in AD pathogenesis that may serve as a druggable target for the treatment of preclinical AD.

We previously predicted the presence of a mechanism in the CNS whereby neuropeptide(s) control A $\beta$  levels via the regulation of NEP activity<sup>4</sup>. Indeed, we found that somatostatin activates NEP *in vitro* and *in vivo* and that a deficiency of somatostatin receptor subtypes 1 and 4 augmented A $\beta$  deposition by diminishing NEP expression in the brain<sup>17</sup>, indicating that specific agonist(s) or

allosteric modulator(s) to such receptors may attenuate A $\beta$  deposition in the preclinical stage. Because somatostatin receptor subtypes are G protein-coupled receptors (GPCRs)<sup>17</sup>, the selective up-regulation of NEP by pharmacological means targeting  $\alpha$  such GPCR(s) may provide an effective, safe, and socioeconomically affordable disease-modifying treatment for preclinical AD patients. Such treatments may replace costly immunotherapy options<sup>58</sup> as GPCRs are the best targets for low molecular weight medications. This strategy is again consistent with the aging-dependent reduction and oxidative inactivation of neprilysin,<sup>24-27</sup> along with the disappearance of somatostatin with aging and in AD<sup>28,29</sup>, all of which would lead to accelerated A $\beta$  deposition.

Concerns however have been expressed in pharmaceutical industry about modifying NEP activity to reduce A $\beta$  levels in the brain because NEP has been suggested to degrade neuropeptides *in vitro*<sup>32-34</sup>. Nonetheless, consistent with Saria et al., who showed that enkephalin levels remained unchanged in the cortices of *Mme* KO mice<sup>35</sup>, a deficiency of NEP had no significant impact on somatostatin, substance P, cholecystokinin, or neuropeptide Y levels in our experiments (**Figure 6**). This is presumably because NEP degrades its substrate(s) inside secretory vesicles and on the presynaptic membrane of excitatory neurons<sup>26,36,37</sup> and because inhibitory neurons in general secrete neuropeptides<sup>38-41</sup>, making it difficult for these neuropeptides to encounter NEP *in vivo*. In contrast, NEP appears to serve as a functional peptidase that degrades neuropeptide(s) in organs such as the heart and kidney<sup>59,60</sup>.

In conclusion, we emphasize that aging-associated down-regulation of NEP is likely a primary cause for SAD and that up-regulation of NEP expression or its activity in the CNS via somatostatin receptor activation should be considered as a strategy to reduce A $\beta$  deposition in preclinical AD to either halt or delay onset of the disease. Our 3<sup>rd</sup> generation mouse model of AD that accumulates wild-type human A $\beta$  very rapidly<sup>61</sup> will become a powerful tool for the primary *in vivo* screening of such medication candidates.



## Materials and Methods

*Animals.* *Mme*-KO mice<sup>10</sup> were kindly provided by Craig Gerard, Harvard Medical School, USA. *Ide*-KO mice<sup>8</sup> were purchased from MMRRC at the University of California, Davis. The generation of *App*<sup>NL-F/NL-F</sup> mice was described previously<sup>11</sup>. *Mme* and *Ide* KO mice were crossbred with *App*<sup>NL-F/NL-F</sup> mice to generate *App*<sup>NL-F/NL-F</sup> X *Mme* KO and *App*<sup>NL-F/NL-F</sup> X *Ide* KO mice, respectively. All double mutant mice used in this study were homozygous for the *App* mutations and NEP or IDE deficiency. C57BL/6J mice were used as wild type controls. Both male and female mice were used for biochemical and immunohistochemical studies. All mice were bred and maintained in accordance with regulations for animal experiments promulgated by the RIKEN Center for Brain Science.

*Genotyping.* Genomic DNA was extracted from mouse tails in lysis buffer (10 mM pH 8.5 Tris-HCl, 5 mM pH 8.0 EDTA, 0.2% SDS, 200 mM NaCl, 20 µg/ml proteinase K) and subjected to PCR. Primers used for genotyping were: 5'-TCCAAATGTGTCAGTTTCATAGCC-3', 5'-GGCTATGACTCATGATGTCATAACAGG-3', and 5'-GCCTATTCTTACCAAATATTCTCCCAG-3' for *Mme* KO mice; 5'-ATAAACCCCTCTTGCAGTTGCATC-3', 5'-ACATACTCCCAGAGCATAGGACG-3', and 5'-CTAATGAAACTGGGAGGGTTGG-3' for *Ide* KO mice; and 5'-ATCTCGGAAGTGAAGATG-3', 5'-ATCTCGGAAGTGAATCTA-3', 5'-TGTAGATGAGAACTTAAC-3' and 5'-CGTATAATGTATGCTATACGAAG-3' for *App*<sup>NL-F/NL-F</sup> mice.

*Brain sample preparation.* Mice were anesthetized with isoflurane and transcardially perfused with ice-cold PBS<sup>11</sup>. Brains were extracted, maintained on ice, and dissected into two halves at the midline. For biochemical analyses, one hemisphere was divided into several parts including the hippocampus, and stored at -80 °C. For immunohistochemical analyses, the brain was fixed with 4% paraformaldehyde in PBS, incubated at 4 °C for 24 h and rinsed with PBS until paraffin processing.

*Western blotting.* Mice brain tissues were homogenized in lysis buffer (50 mM Tris pH 7.6, 0.15 M NaCl and Complete protease inhibitor cocktail (Roche))<sup>11</sup>. Homogenates were incubated at 4 °C for 1 h, centrifuged at 15,000 rpm for 30 min, and the supernatants were collected. Equal amounts of proteins per lane were subjected to SDS-PAGE and transferred to PVDF or nitrocellulose membranes (Invitrogen). To detect APP-CTFs, delipidated samples were loaded and the membrane was boiled for 5 min in PBS before the next step. After washing and blocking at room temperature, the membranes were incubated at 4 °C overnight with primary antibodies against full-length APP (1:1,000, Millipore), APP-CTFs (1:1,000, Sigma-Aldrich), NEP (1:500, R&D Systems), IDE (1:1,000, Abcam) or against GAPDH as a loading control (HRP conjugated, 1:150,000, ProteinTech). The target protein on the membrane was visualized with ECL Select (GE Healthcare) and a Luminescent Image Analyzer LAS-3000 Mini (Fujifilm).

**Immunostaining.** Paraffin-embedded mouse brain sections were subjected to deparaffinization and then antigen retrieval was performed by autoclave processing at 121 °C for 5 min<sup>11</sup>. After inactivation of endogenous peroxidases using 0.3% H<sub>2</sub>O<sub>2</sub> solution for 30 min, the sections were washed with TNT buffer (0.1 M Tris pH 7.5, 0.15 M NaCl, 0.05% Tween20), blocked for 30 min in TNB buffer (0.1 M Tris pH 7.5, 0.15 M NaCl) and incubated overnight at 4 °C in the same buffer with primary antibodies. The primary antibody dilution ratios were as follows: A $\beta$ 1-5 (N1D)<sup>62</sup> (1:200), GFAP (1:200, Millipore), Iba1 (1:200, Wako), synaptophysin (1:200, PROGEN), and PSD95 (1:50). Amyloid pathology was detected using biotinylated secondary antibody and tyramide signal amplification as described previously (Enya, 1999). Before mounting, the sections were treated when necessary with Hoechst33342 diluted in PBS. Data images were obtained using a NanoZoomer Digital Pathology C9600 (Hamamatsu Photonics) and EVOS M5000 Imaging System (Thermo Fisher scientific). Immunoreactive signals were quantified by Definiens Tissue Studio (Definiens).

**ELISA.** Mouse cortical samples were homogenized in buffer A (50 mM Tris-HCl, pH 7.6, 150 mM NaCl and protease inhibitor cocktail) using a medical beads shocker<sup>11</sup>. The homogenized samples were directed to centrifugation at 200,000×g for 20 min at 4 °C, and the supernatant was collected as a TS-soluble fraction. The pellet was loosened with buffer A, centrifuged at 200,000×g for 5 min at 4 °C, and then dissolved in 6 M Gu-HCl buffer. After incubation at room temperature for 1 h, the sample was sonicated at 25 °C for 1 min. Subsequently, the sample was centrifuged at 200,000×g for 20 min at 25°C and the supernatant collected as a GuHCl fraction. 100  $\mu$ l of TS and GuHCl fractions were loaded onto 96-well plates and incubated at 4 °C overnight using the A $\beta$ <sub>40</sub> and A $\beta$ <sub>42</sub> ELISA kit (Wako) according to the manufacturer's instructions.

**Statistics.** All data are shown as the mean  $\pm$  S.E.M. For comparisons between two groups, statistical analyses were conducted by Student's *t*-test. For comparisons among three groups, one-way analysis of variance (ANOVA) was used followed by Tukey's multiple comparisons test. These analyses were performed using GraphPad Prizm 8 software (GraphPad software). The levels of statistical significance were shown as P-values: \*  $P < 0.05$ , \*\*  $P < 0.01$ , \*\*\*  $P < 0.001$ , and \*\*\*\*  $P < 0.0001$ .

### **Author Contributions**

HS, RT, TS, NI, and TCS designed the research plan. HS, RT, NW, NK, RF, NY, MS, KW, YM, and ST performed the experiments. HS, RT, NK, SH, ST, TS, NI, and TCS analyzed and interpreted data. HS, RT, NW, SH, TS, NI and TCS wrote the manuscript. HS, TO, TS, NI and TCS supervised the entire research progress.

### **Acknowledgements**

We thank Taisuke Tomita, University of Tokyo, for valuable discussion. We also thank Yukiko Nagai-Watanabe for secretarial work. This work was supported by AMED under Grant Number JP20dm0207001 (Brain Mapping by Integrated Neurotechnologies for Disease Studies (Brain/MINDS)) (TCS) and JSPS KAKENHI Grant Number JP18K07402 (HS).

**Conflicts of interest**

The authors have no conflicts of interest to declare.

**Figures and Figure legends**

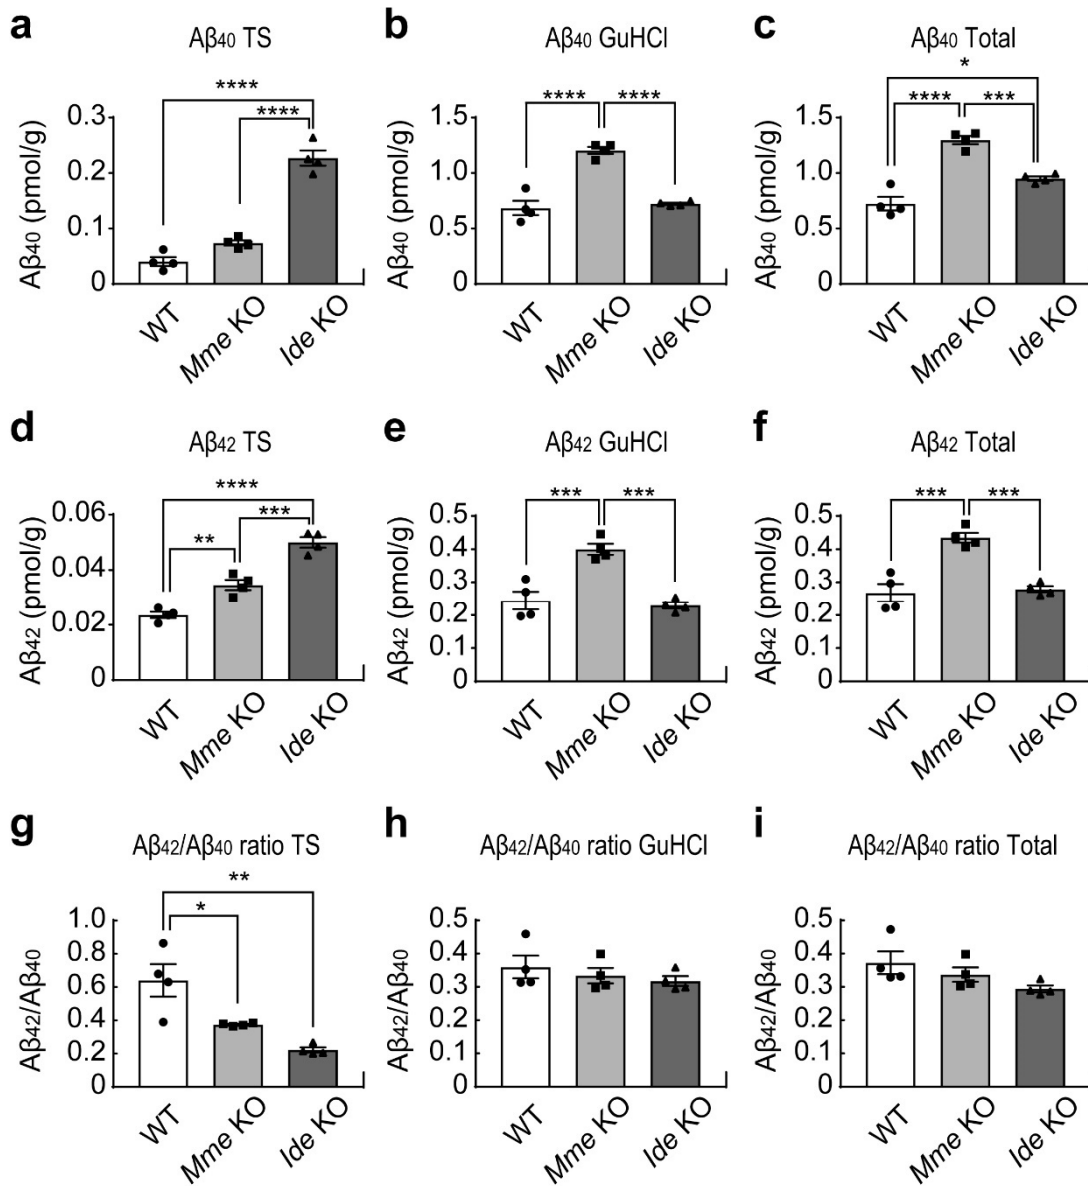

**Fig. 1. Aβ in *Mme* KO and *Ide* KO mice.**

**a-f**, Measurement of Aβ<sub>42</sub> (**a-c**) or Aβ<sub>40</sub> (**d-f**) levels by ELISA in Tris-buffered saline (TS) fractions (**a, d, g**), guanidine hydrochloride (GuHCl) fractions (**b, e, h**) and total fractions (**c, f, i**) from the brains of 12-month-old wild type (WT), *membrane metallo endopeptidase* (*Mme*, encoding NEP)-knock-out (KO) and *insulin degrading enzyme* (*Ide*) KO mice ( $n = 4$ ). One-way ANOVA followed by Tukey's multiple comparisons test. \* $p < 0.05$ , \*\* $p < 0.01$ , \*\*\* $p < 0.001$ , \*\*\*\* $p < 0.0001$ . **g-i**, Aβ<sub>42</sub>/Aβ<sub>40</sub> ratios in TS, GuHCl and total fractions prepared from brains of 12-month-old WT, *Mme* KO, and *Ide* KO mice ( $n = 4$ ).

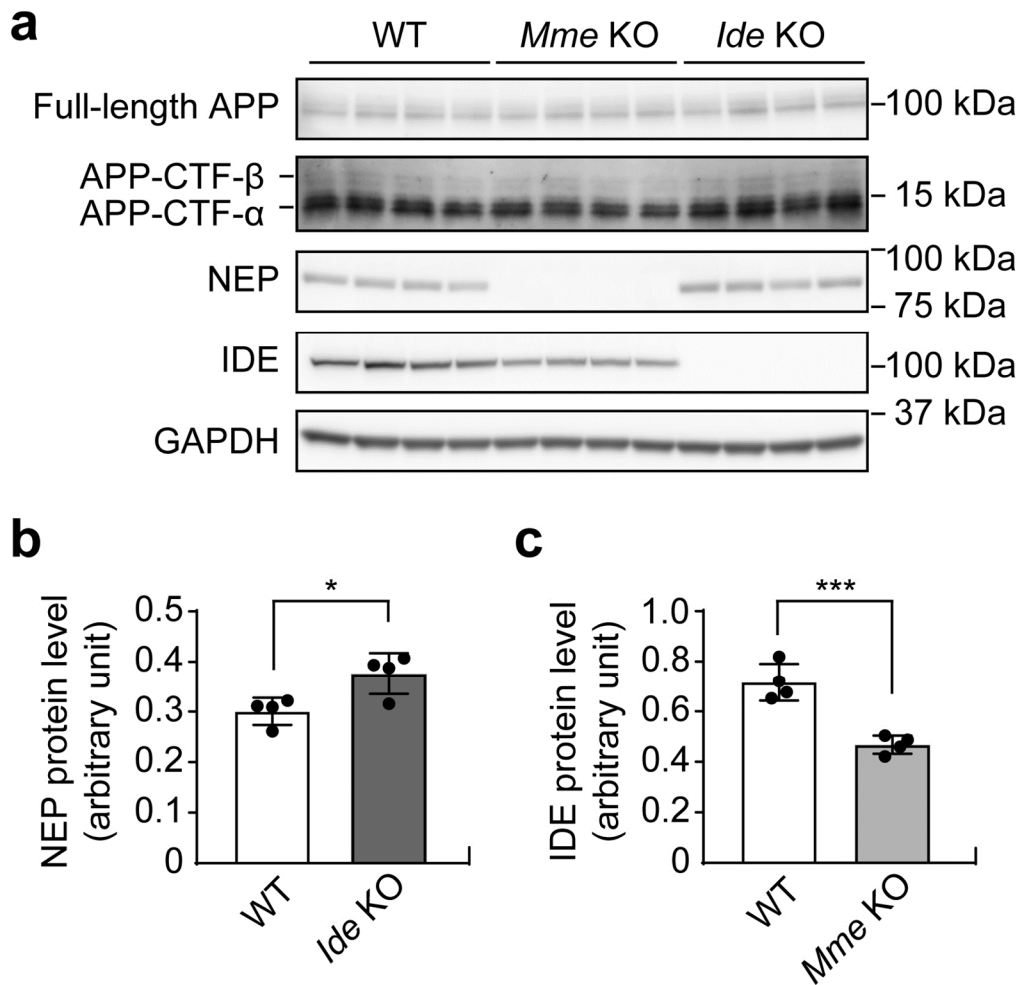

**Fig. 2. Processing of APP in *Mme* KO and *Ide* KO mice.**

**a**, Western blot of full-length (FL) APP, APP C terminal fragments (CTF), NEP, IDE, and GAPDH in the cortices of 12-month-old WT, *Mme* KO and *Ide* KO mice ( $n = 4$ ). **b**, **c**, Quantifications of NEP (**b**) and IDE (**c**) in the cortices of 12-month-old WT and *Mme* KO or *Ide* KO mice ( $n = 4$ ). Student's *t*-test. \* $p > 0.05$ , \*\*\* $p > 0.001$ . A deficiency of NEP or IDE exerted no effect on APP expression or  $\beta$ -cleavage activity, confirming that changes in  $A\beta$  levels were due to alterations in  $A\beta$  degradation. The expression of NEP was increased in *Ide* KO mice, while the expression of IDE was decreased in *Mme* KO mice.

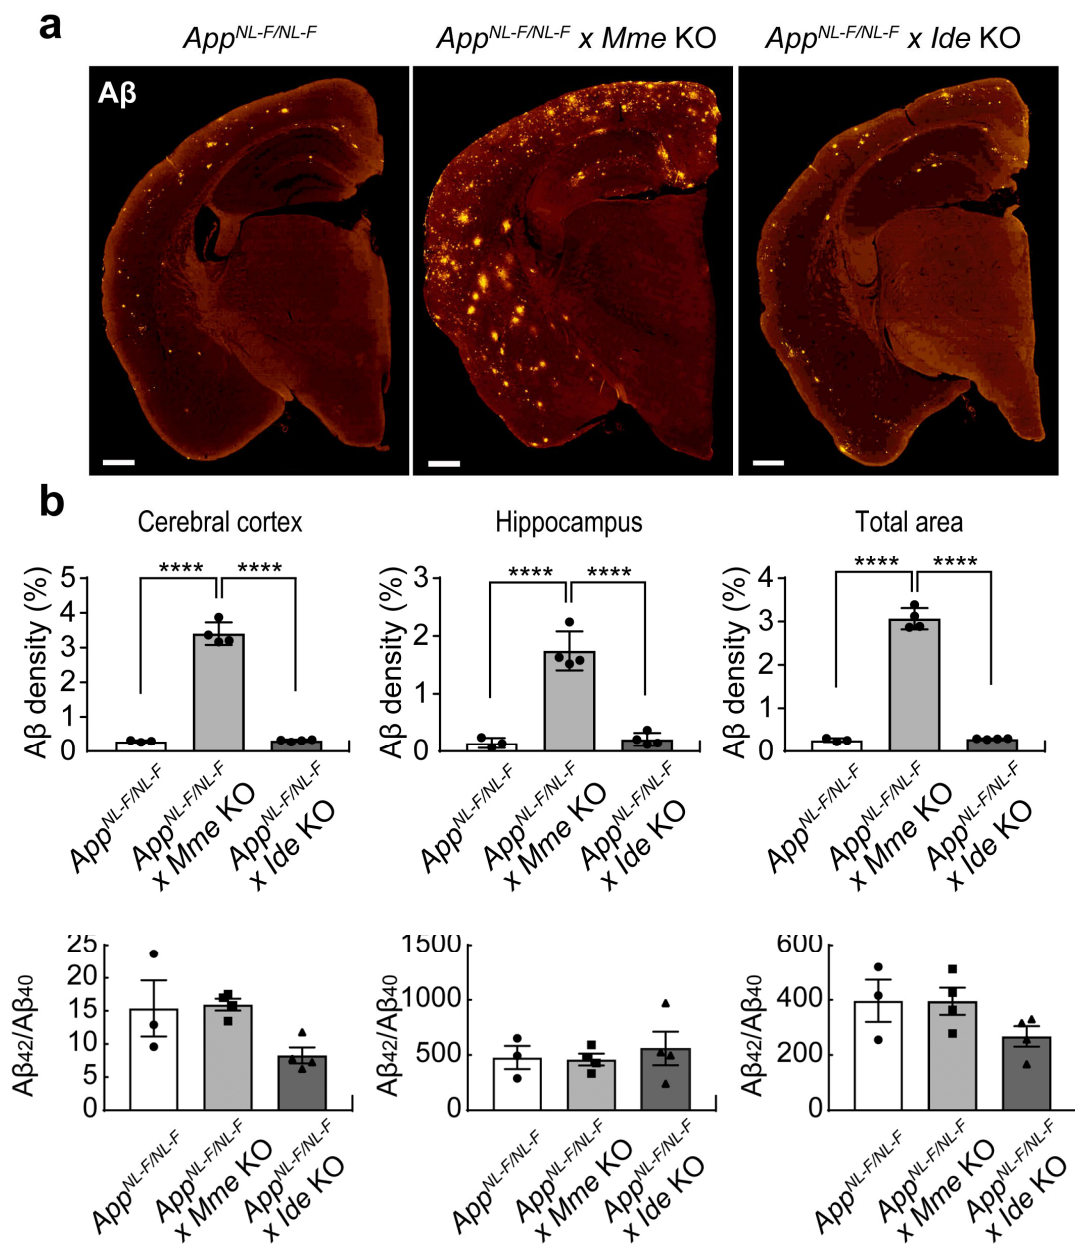

**Fig. 3. Aβ in *App<sup>NL-F/NL-F</sup> x Mme KO* and *App<sup>NL-F/NL-F</sup> x Ide KO* mice.**

**a-f**, Measurement of Aβ<sub>42</sub> (**a-c**) or Aβ<sub>40</sub> (**d-f**) levels by ELISA in TS fractions (**a, d, g**), GuHCl fractions (**b, e, h**), and total fractions (**c, f, i**) prepared from brains of 12-month-old *App<sup>NL-F/NL-F</sup>*, *App<sup>NL-F/NL-F</sup> x Mme KO* and *App<sup>NL-F/NL-F</sup> x Ide KO* mice ( $n = 3\sim 4$ ). **g-i**, Aβ<sub>42</sub>/Aβ<sub>40</sub> ratio in brains of 12-month-old *App<sup>NL-F/NL-F</sup>*, *App<sup>NL-F/NL-F</sup> x Mme KO* and *App<sup>NL-F/NL-F</sup> x Ide KO* mice ( $n = 3\sim 4$ ). One-way ANOVA followed by Tukey's multiple comparisons test. \* $p < 0.05$ , \*\* $p < 0.01$ , \*\*\* $p < 0.001$ . NEP mainly degrades GuHCl-soluble (TS-insoluble) Aβ species, whereas IDE mainly targets TS-soluble Aβ.

**Fig. 4. A $\beta$  deposition in *App*<sup>NL-F/NL-F</sup> x *Mme* KO and *App*<sup>NL-F/NL-F</sup> x *Ide* KO mice**

**a**, A $\beta$  deposition in *App*<sup>NL-F/NL-F</sup> (left), *App*<sup>NL-F/NL-F</sup> x *Mme* KO (middle), and *App*<sup>NL-F/NL-F</sup> x *Ide* KO (right) mouse brains. Brain sections from 12-month-old mice were immunostained using antibody to N-terminal A $\beta$  (N1D). Scale bars represent 500  $\mu$ m. **b**, Area quantification of N1D immunostaining (a) in the cortex (left), hippocampus (middle) and hemicephalia (right) of 12-month-old *App*<sup>NL-F/NL-F</sup>, *App*<sup>NL-F/NL-F</sup> x *Mme* KO and *App*<sup>NL-F/NL-F</sup> x *Ide* KO mice ( $n = 3\sim 4$ ). One-way ANOVA followed by Tukey's multiple comparisons test. \*\*\*\* $p < 0.0001$ .

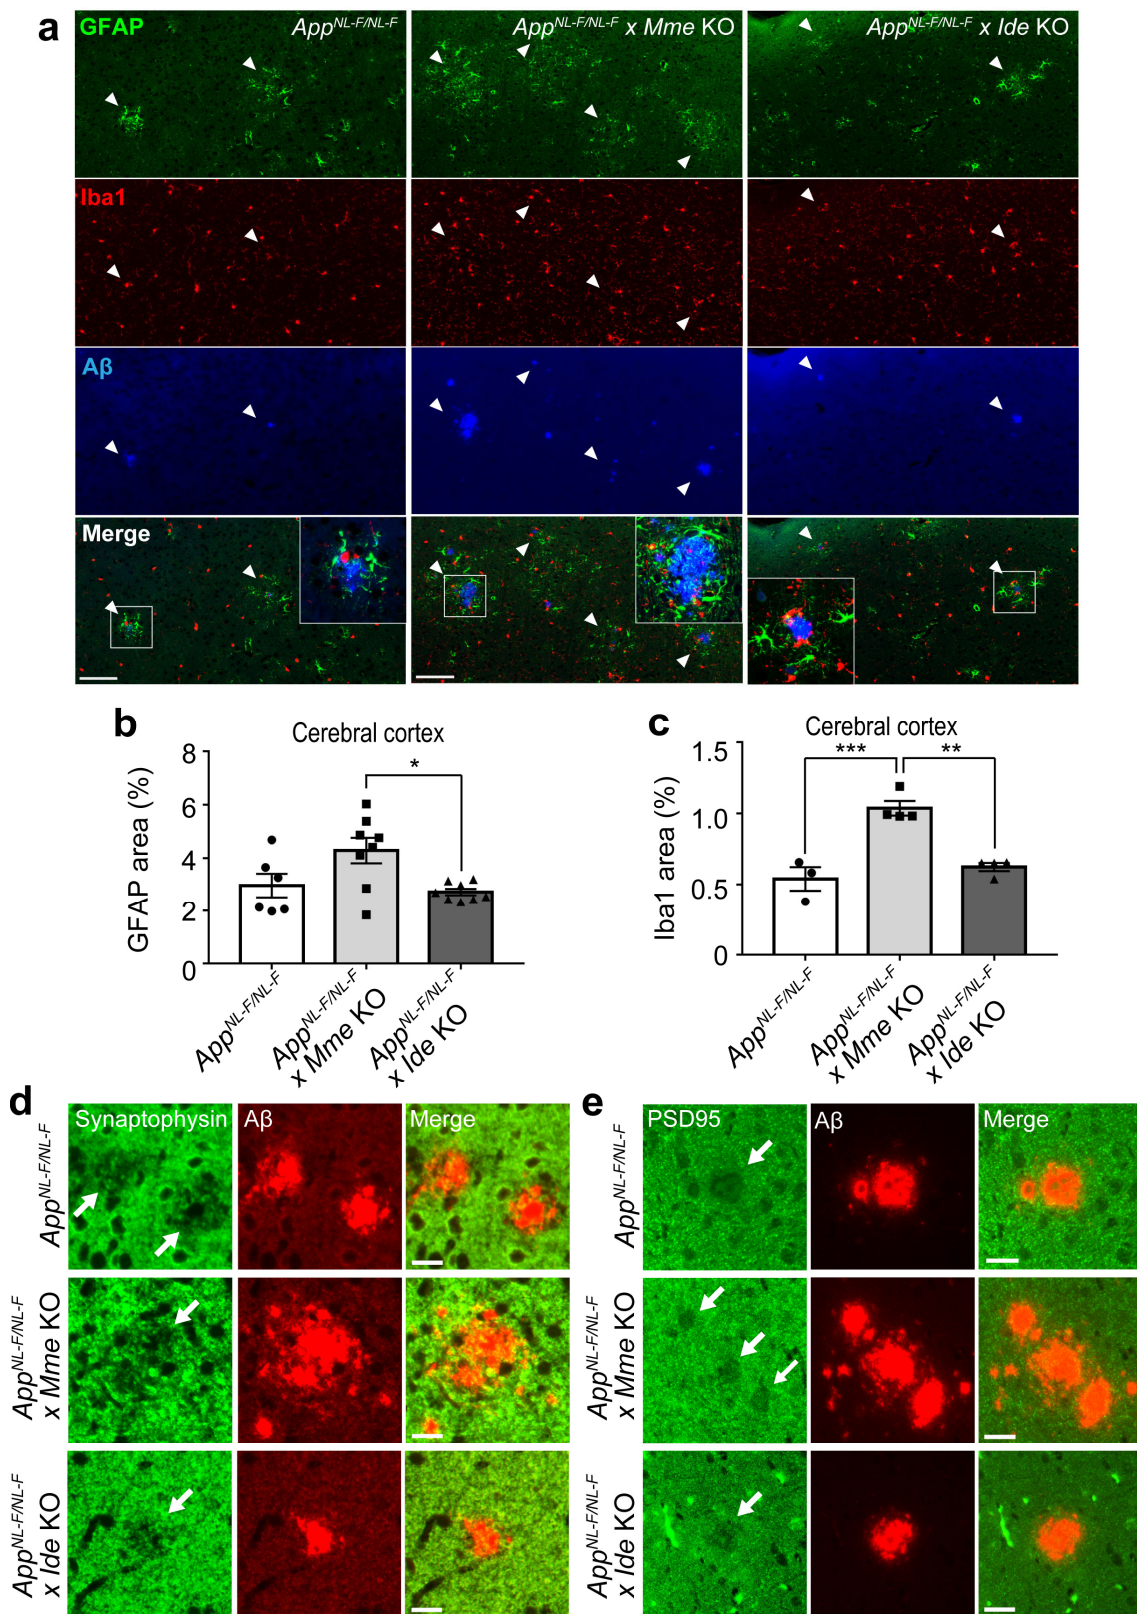

**Fig. 5. Neuroinflammation and synaptic alterations in  $App^{NL-F/NL-F}$  x  $Mme$  KO and  $App^{NL-F/NL-F}$**



**x *Ide* KO mice**

**a**, Astrocytosis (green) and microgliosis (red) in  $App^{NL-F/NL-F}$  (left),  $App^{NL-F/NL-F} \times Mme$  KO (middle), and  $App^{NL-F/NL-F} \times Ide$  KO (right) mouse brains. Brain sections from 12-month-old mice were immunostained using antibody to GFAP, Iba1, and N-terminal A $\beta$  (N1D, blue). Scale bars represent 500  $\mu$ m (low magnification) and 100  $\mu$ m (high magnification). **b, c**, Area quantification of astrocytosis (**b**) and microgliosis (**c**) in the cortices of 12-month-old  $App^{NL-F/NL-F}$ ,  $App^{NL-F/NL-F} \times Mme$  KO and  $App^{NL-F/NL-F} \times Ide$  KO mice ( $n = 3\sim 4$ ). One-way ANOVA followed by Tukey's multiple comparisons test.  $*p < 0.05$ ,  $**p < 0.01$ , and  $***p < 0.001$ . **d, e**, Synaptic alterations in the brains of 12-month-old  $App^{NL-F/NL-F}$ ,  $App^{NL-F/NL-F} \times Mme$  KO and  $App^{NL-F/NL-F} \times Ide$  KO mice. Double staining was performed using N1D (**d**) or 82E1 (**e**) antibodies with a presynaptic marker (antibody to synaptophysin, **d**) and with a postsynaptic marker (antibody to PSD95, **e**). Scale bars represent 10  $\mu$ m.

**a) Somatostatin**

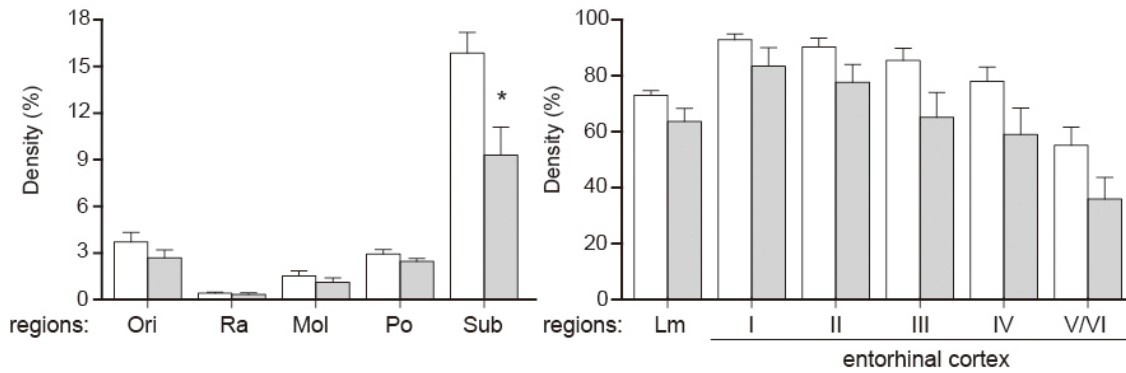

**b) Substance P**

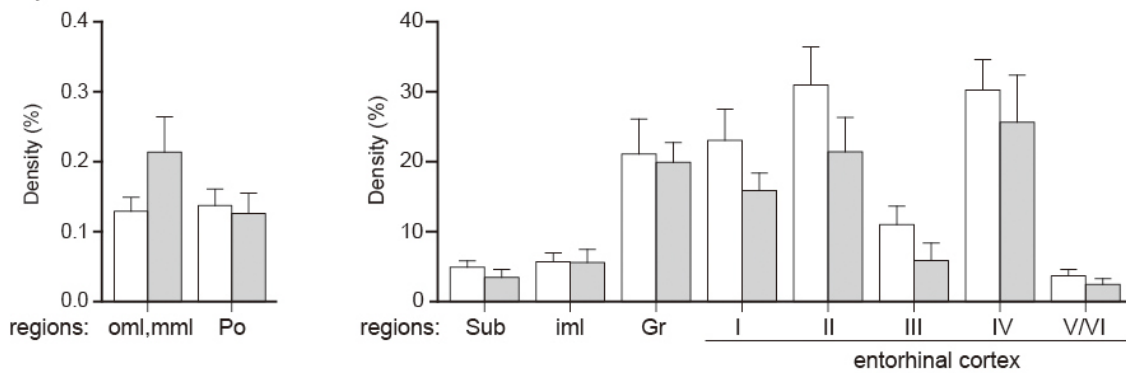

**c) Cholecystokinin**

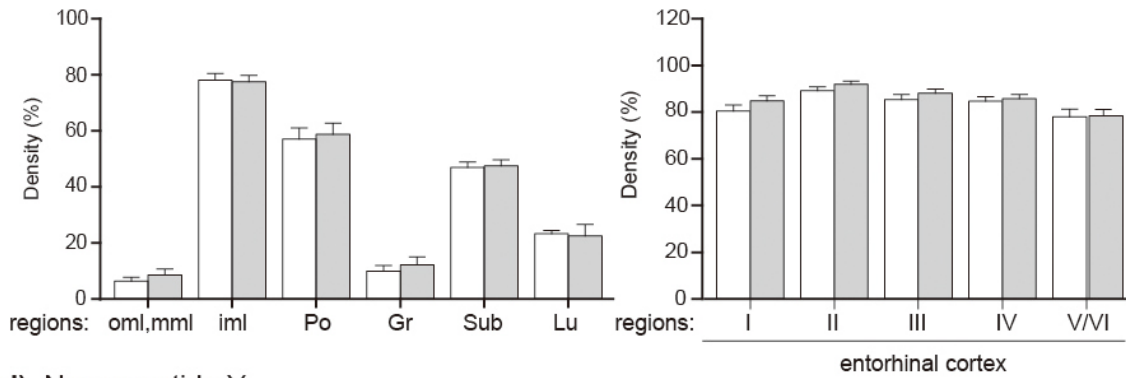

**d) Neuropeptide Y**

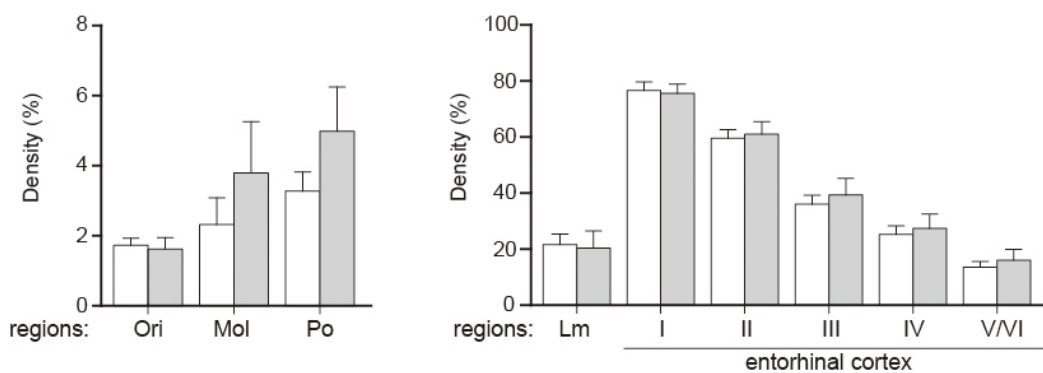

□ wild-type (n=7)    ■ *Mme* KO (n=8)

**Fig. 6. Quantification of immunohistochemical images for four neuropeptides (somatostatin, substance P, cholecystokinin, and neuropeptide Y) in wild-type and *Mme* KO mouse brains.** Representative immunohistochemistry images are shown in Supplementary Figures 2-5. The open and gray columns indicate wild-type and *Mme* KO mice, respectively. Mice deficient in somatostatin precursor<sup>16</sup> were used as a negative control to confirm specificity of the staining. The abbreviations used are represented in Fig. 2S. \* $p < 0.05$ , significantly different from wild-type tissues.

- 1 Bateman, R. J. *et al.* Clinical and biomarker changes in dominantly inherited Alzheimer's disease. *N Engl J Med* **367**, 795-804, doi:10.1056/NEJMoa1202753 (2012).
- 2 Selkoe, D. J. & Hardy, J. The amyloid hypothesis of Alzheimer's disease at 25 years. *EMBO Mol Med* **8**, 595-608, doi:10.15252/emmm.201606210 (2016).
- 3 Saido, T. C. in *A $\beta$  Metabolism and Alzheimer's disease* (ed T.C. Saido) 1-16 (Landes Bioscience, 2003).
- 4 Saito, T., Takaki, Y., Iwata, N., Trojanowski, J. & Saido, T. C. Alzheimer's Disease, Neuropeptides, Neuropeptidase, and Amyloid- $\beta$  Peptide Metabolism. *Sci. Aging Knowl. Environ.* **2003**, pe1-, doi:10.1126/sageke.2003.3.pe1 (2003).
- 5 Iwata, N. *et al.* Identification of the major A $\beta$ 1-42-degrading catabolic pathway in brain parenchyma: suppression leads to biochemical and pathological deposition. *Nature medicine* **6**, 143-150, doi:10.1038/72237 (2000).
- 6 Iwata, N. *et al.* Metabolic regulation of brain A $\beta$  by neprilysin. *Science (New York, N.Y.)* **292**, 1550-1552, doi:10.1126/science.1059946 (2001).
- 7 Qiu, W. Q. *et al.* Insulin-degrading enzyme regulates extracellular levels of amyloid beta-protein by degradation. *J Biol Chem* **273**, 32730-32738 (1998).
- 8 Farris, W. *et al.* Insulin-degrading enzyme regulates the levels of insulin, amyloid beta-protein, and the beta-amyloid precursor protein intracellular domain in vivo. *Proceedings of the National Academy of Sciences of the United States of America* **100**, 4162-4167, doi:10.1073/pnas.0230450100 (2003).
- 9 Leissring, M. A. *et al.* Enhanced proteolysis of beta-amyloid in APP transgenic mice prevents plaque formation, secondary pathology, and premature death. *Neuron* **40**, 1087-1093 (2003).
- 10 Lu, B. *et al.* Neutral endopeptidase modulation of septic shock. *The Journal of experimental medicine* **181**, 2271-2275, doi:10.1084/jem.181.6.2271 (1995).
- 11 Saito, T. *et al.* Single App knock-in mouse models of Alzheimer's disease. *Nat Neurosci* **17**, 661-663, doi:10.1038/nn.3697 (2014).
- 12 Sasaguri, H. *et al.* APP mouse models for Alzheimer's disease preclinical studies. *EMBO J* **36**, 2473-2487, doi:10.15252/emboj.201797397 (2017).
- 13 Hama, E., Shirotani, K., Iwata, N. & Saido, T. C. Effects of neprilysin chimeric proteins targeted to subcellular compartments on amyloid beta peptide clearance in primary neurons. *Journal of Biological Chemistry* **279**, 30259-30264, doi:10.1074/jbc.M401891200 (2004).
- 14 Nilsson, P. *et al.* Gene therapy in Alzheimer's disease - potential for disease modification.

- Journal of Cellular and Molecular Medicine* **14**, 741-757, doi:10.1111/j.1582-4934.2010.01038.x (2010).
- 15 Iwata, N. *et al.* Global brain delivery of neprilysin gene by intravascular administration of AAV vector in mice. *Scientific reports* **3**, 1472, doi:10.1038/srep01472 (2013).
- 16 Saito, T. *et al.* Somatostatin regulates brain amyloid beta peptide A beta(42) through modulation of proteolytic degradation. *Nature medicine* **11**, 434-439, doi:10.1038/nm1206 (2005).
- 17 Nilsson, P. *et al.* Somatostatin receptor subtypes 1 and 4 redundantly regulate neprilysin, the major amyloid-beta degrading enzyme in brain. *bioRxiv*, 2020.2005.2009.085795, doi:10.1101/2020.05.09.085795 (2020).
- 18 Watamura, N. *et al.*  $\alpha$ -Endosulfine regulates amyloid  $\beta$  42 via the modulation of neprilysin activity. *bioRxiv*, 2020.2010.2007.329318, doi:10.1101/2020.10.07.329318 (2020).
- 19 Burgos-Ramos, E. *et al.* Somatostatin and Alzheimer's disease. *Molecular and cellular endocrinology* **286**, 104-111, doi:10.1016/j.mce.2008.01.014 (2008).
- 20 Higuchi, M., Iwata, N. & Saido, T. C. Understanding molecular mechanisms of proteolysis in Alzheimer's disease: progress toward therapeutic interventions. *Biochim Biophys Acta* **1751**, 60-67, doi:10.1016/j.bbapap.2005.02.013 (2005).
- 21 Higuchi, M. *et al.* F-19 and H-1 MRI detection of amyloid beta plaques in vivo. *Nature Neuroscience* **8**, 527-533, doi:10.1038/nn1422 (2005).
- 22 Saido, T. C. & Iwata, N. Metabolism of amyloid beta peptide and pathogenesis of Alzheimer's disease. Towards presymptomatic diagnosis, prevention and therapy. *Neurosci Res* **54**, 235-253, doi:10.1016/j.neures.2005.12.015 (2006).
- 23 Nalivaeva, N. N. & Turner, A. J. Targeting amyloid clearance in Alzheimer's disease as a therapeutic strategy. *British journal of pharmacology* **176**, 3447-3463, doi:10.1111/bph.14593 (2019).
- 24 Russo, R., Borghi, R., Markesbery, W., Tabaton, M. & Piccini, A. Neprilysin decreases uniformly in Alzheimer's disease and in normal aging. *FEBS letters* **579**, 6027-6030, doi:10.1016/j.febslet.2005.09.054 (2005).
- 25 Wang, D. S., Iwata, N., Hama, E., Saido, T. C. & Dickson, D. W. Oxidized neprilysin in aging and Alzheimer's disease brains. *Biochemical and biophysical research communications* **310**, 236-241, doi:10.1016/j.bbrc.2003.09.003 (2003).
- 26 Iwata, N., Takaki, Y., Fukami, S., Tsubuki, S. & Saido, T. C. Region-specific reduction of A beta-degrading endopeptidase, neprilysin, in mouse hippocampus upon aging. *J Neurosci Res* **70**, 493-500, doi:10.1002/jnr.10390 (2002).
- 27 Hellstrom-Lindahl, E., Ravid, R. & Nordberg, A. Age-dependent decline of neprilysin in

- Alzheimer's disease and normal brain: inverse correlation with A beta levels. *Neurobiology of aging* **29**, 210-221, doi:10.1016/j.neurobiolaging.2006.10.010 (2008).
- 28 Lu, T. *et al.* Gene regulation and DNA damage in the ageing human brain. *Nature* **429**, 883-891, doi:10.1038/nature02661 (2004).
- 29 Davies, P., Katzman, R. & Terry, R. D. Reduced somatostatin-like immunoreactivity in cerebral cortex from cases of Alzheimer disease and Alzheimer senile dementia. *Nature* **288**, 279-280 (1980).
- 30 Bellenguez, C. *et al.* New insights on the genetic etiology of Alzheimer's and related dementia. *medRxiv*, 2020.2010.2001.20200659, doi:10.1101/2020.10.01.20200659 (2020).
- 31 Schwartzenuber, J. *et al.* Genome-wide meta-analysis, fine-mapping and integrative prioritization implicate new Alzheimer's disease risk genes. *Nat Genet* **53**, 392-402, doi:10.1038/s41588-020-00776-w (2021).
- 32 Turner, A. J., Isaac, R. E. & Coates, D. The neprilysin (NEP) family of zinc metalloendopeptidases: genomics and function. *BioEssays : news and reviews in molecular, cellular and developmental biology* **23**, 261-269, doi:10.1002/1521-1878(200103)23:3<261::Aid-bies1036>3.0.Co;2-k (2001).
- 33 Turner, A. J., Murphy, L. J., Medeiros, M. S. & Barnes, K. Endopeptidase-24.11 (neprilysin) and relatives: twenty years on. *Advances in experimental medicine and biology* **389**, 141-148 (1996).
- 34 Turner, A. J., Brown, C. D., Carson, J. A. & Barnes, K. The neprilysin family in health and disease. *Advances in experimental medicine and biology* **477**, 229-240, doi:10.1007/0-306-46826-3\_25 (2000).
- 35 Saria, A. *et al.* Opioid-related changes in nociceptive threshold and in tissue levels of enkephalins after target disruption of the gene for neutral endopeptidase (EC 3.4.24.11) in mice. *Neuroscience letters* **234**, 27-30 (1997).
- 36 Fukami, S. *et al.* A beta-degrading endopeptidase, neprilysin, in mouse brain: synaptic and axonal localization inversely correlating with A beta pathology. *Neuroscience Research* **43**, 39-56, doi:10.1016/s0168-0102(02)00015-9 (2002).
- 37 Iwata, N. *et al.* Presynaptic localization of neprilysin contributes to efficient clearance of amyloid-beta peptide in mouse brain. *Journal of Neuroscience* **24**, 991-998, doi:10.1523/jneurosci.4792-03.2004 (2004).
- 38 Epelbaum, J., Dournaud, P., Fodor, M. & Viollet, C. The neurobiology of somatostatin. *Crit Rev Neurobiol* **8**, 25-44 (1994).
- 39 Nässel, D. R. Neuropeptide signaling near and far: how localized and timed is the action of neuropeptides in brain circuits? *Invert Neurosci* **9**, 57-75, doi:10.1007/s10158-009-

- 0090-1 (2009).
- 40 Robbins, R. Somatostatin and the cerebral cortex. *Advances in experimental medicine and biology* **188**, 201-215, doi:10.1007/978-1-4615-7886-4\_12 (1985).
- 41 Xapelli, S., Agasse, F., Ferreira, R., Silva, A. P. & Malva, J. O. Neuropeptide Y as an endogenous antiepileptic, neuroprotective and pro-neurogenic peptide. *Recent Pat CNS Drug Discov* **1**, 315-324, doi:10.2174/157488906778773689 (2006).
- 42 O'Brien, R. J. & Wong, P. C. Amyloid precursor protein processing and Alzheimer's disease. *Annu Rev Neurosci* **34**, 185-204, doi:10.1146/annurev-neuro-061010-113613 (2011).
- 43 Belyaev, N. D., Nalivaeva, N. N., Makova, N. Z. & Turner, A. J. Neprilysin gene expression requires binding of the amyloid precursor protein intracellular domain to its promoter: implications for Alzheimer disease. *EMBO reports* **10**, 94-100, doi:10.1038/embor.2008.222 (2009).
- 44 Eisele, Y. S. *et al.* Gleevec increases levels of the amyloid precursor protein intracellular domain and of the amyloid-beta degrading enzyme neprilysin. *Molecular biology of the cell* **18**, 3591-3600, doi:10.1091/mbc.e07-01-0035 (2007).
- 45 Grimm, M. O. *et al.* APP intracellular domain derived from amyloidogenic  $\beta$ - and  $\gamma$ -secretase cleavage regulates neprilysin expression. *Frontiers in aging neuroscience* **7**, 77, doi:10.3389/fnagi.2015.00077 (2015).
- 46 Grimm, M. O. *et al.* Neprilysin and A $\beta$  Clearance: Impact of the APP Intracellular Domain in NEP Regulation and Implications in Alzheimer's Disease. *Frontiers in aging neuroscience* **5**, 98, doi:10.3389/fnagi.2013.00098 (2013).
- 47 Pardossi-Piquard, R. *et al.* Presenilin-dependent transcriptional control of the Abeta-degrading enzyme neprilysin by intracellular domains of betaAPP and APLP. *Neuron* **46**, 541-554, doi:10.1016/j.neuron.2005.04.008 (2005).
- 48 Citron, M. *et al.* Mutation of the beta-amyloid precursor protein in familial Alzheimer's disease increases beta-protein production. *Nature* **360**, 672-674, doi:10.1038/360672a0 (1992).
- 49 Lichtenthaler, S. F. *et al.* Mechanism of the cleavage specificity of Alzheimer's disease gamma-secretase identified by phenylalanine-scanning mutagenesis of the transmembrane domain of the amyloid precursor protein. *Proceedings of the National Academy of Sciences of the United States of America* **96**, 3053-3058 (1999).
- 50 Walsh, D. M. *et al.* Naturally secreted oligomers of amyloid beta protein potently inhibit hippocampal long-term potentiation in vivo. *Nature* **416**, 535-539, doi:10.1038/416535a (2002).
- 51 Masuda, A. *et al.* Cognitive deficits in single App knock-in mouse models. *Neurobiol Learn*

- Mem* **135**, 73-82, doi:10.1016/j.nlm.2016.07.001 (2016).
- 52 Ransohoff, R. M. & El Khoury, J. Microglia in Health and Disease. *Cold Spring Harbor perspectives in biology* **8**, a020560, doi:10.1101/cshperspect.a020560 (2015).
- 53 Jun, H. *et al.* Disrupted Place Cell Remapping and Impaired Grid Cells in a Knockin Model of Alzheimer's Disease. *Neuron* **107**, 1095-1112.e1096, doi:10.1016/j.neuron.2020.06.023 (2020).
- 54 Takamura, R. *et al.* Modality-Specific Impairment of Hippocampal CA1 Neurons of Alzheimer's Disease Model Mice. *The Journal of neuroscience : the official journal of the Society for Neuroscience* **41**, 5315-5329, doi:10.1523/jneurosci.0208-21.2021 (2021).
- 55 Chen, W. T. *et al.* Spatial Transcriptomics and In Situ Sequencing to Study Alzheimer's Disease. *Cell* **182**, 976-991.e919, doi:10.1016/j.cell.2020.06.038 (2020).
- 56 Qin, Q. *et al.* TREM2, microglia, and Alzheimer's disease. *Mech Ageing Dev* **195**, 111438, doi:10.1016/j.mad.2021.111438 (2021).
- 57 Sobue, A. *et al.* Microglial gene signature reveals loss of homeostatic microglia associated with neurodegeneration of Alzheimer's disease. *Acta Neuropathol Commun* **9**, 1, doi:10.1186/s40478-020-01099-x (2021).
- 58 Marasco, R. A. Current and evolving treatment strategies for the Alzheimer disease continuum. *Am J Manag Care* **26**, S167-s176, doi:10.37765/ajmc.2020.88481 (2020).
- 59 Judge, P., Haynes, R., Landray, M. J. & Baigent, C. Neprilysin inhibition in chronic kidney disease. *Nephrol Dial Transplant* **30**, 738-743, doi:10.1093/ndt/gfu269 (2015).
- 60 Haynes, R. *et al.* Chronic kidney disease, heart failure and neprilysin inhibition. *Nephrol Dial Transplant* **35**, 558-564, doi:10.1093/ndt/gfz058 (2020).
- 61 Sato, K. *et al.* A 3(rd) generation mouse model of Alzheimer's disease shows early and increased cored plaque pathology composed of wild-type human amyloid  $\beta$  peptide. *J Biol Chem*, 101004, doi:10.1016/j.jbc.2021.101004 (2021).
- 62 Saido, T. C. *et al.* Spatial resolution of the primary beta-amyloidogenic process induced in postischemic hippocampus. *J Biol Chem* **269**, 15253-15257 (1994).



## Supplementary Information

### **Neprilysin-sensitive amyloidogenic A $\beta$ versus IDE-sensitive soluble A $\beta$ : a probable mechanistic cause for sporadic Alzheimer's disease**

Hiroki Sasaguri<sup>1,\*</sup>, Risa Takamura<sup>1,2</sup>, Naoto Watamura<sup>1</sup>, Naomasa Kakiya<sup>1</sup>, Toshio Ohshima<sup>2</sup>, Ryo Fujioka<sup>1</sup>, Naomi Yamazaki<sup>1</sup>, Misaki Sekiguchi<sup>1</sup>, Kaori Iwata<sup>3</sup>, Yukio Matsuba<sup>1</sup>, Shoko Hashimoto<sup>1</sup>, Satoshi Tsubuki<sup>1</sup>, Takashi Saito<sup>1,3,4,5</sup>, Nobuhisa Iwata<sup>3,\*</sup>, Takaomi C. Saido<sup>1,\*</sup>

<sup>1</sup>Laboratory for Proteolytic Neuroscience, RIKEN Center for Brain Science, 2-1 Hirosawa, Wako, Saitama 351-0198, Japan

<sup>2</sup>Laboratory for Molecular Brain Science, Department of Life Science and Medical Bioscience, Waseda University, Shinjuku, Tokyo 162-8480, Japan

<sup>3</sup>Department of Genome-based Drug Discovery & Unit for Brain Research, Graduate School of Biomedical Sciences, Nagasaki University, Nagasaki, 852-8521, Japan

<sup>4</sup>Department of Neurocognitive Science, Institute of Brain Science, Nagoya City University Graduate School of Medical Sciences, Nagoya, Aichi 467-8601, Japan

<sup>5</sup>Department of Neuroscience and Pathobiology, Research Institute of Environmental Medicine, Nagoya University, Nagoya, Aichi 464-8601, Japan

5

\*Corresponding authors:

[hiroki.sasaguri.riken@jp](mailto:hiroki.sasaguri.riken@jp); [iwata-n@nagasaki-u.ac.jp](mailto:iwata-n@nagasaki-u.ac.jp); [takaomi.saido@riken.jp](mailto:takaomi.saido@riken.jp)

Supplementary Figure 1.

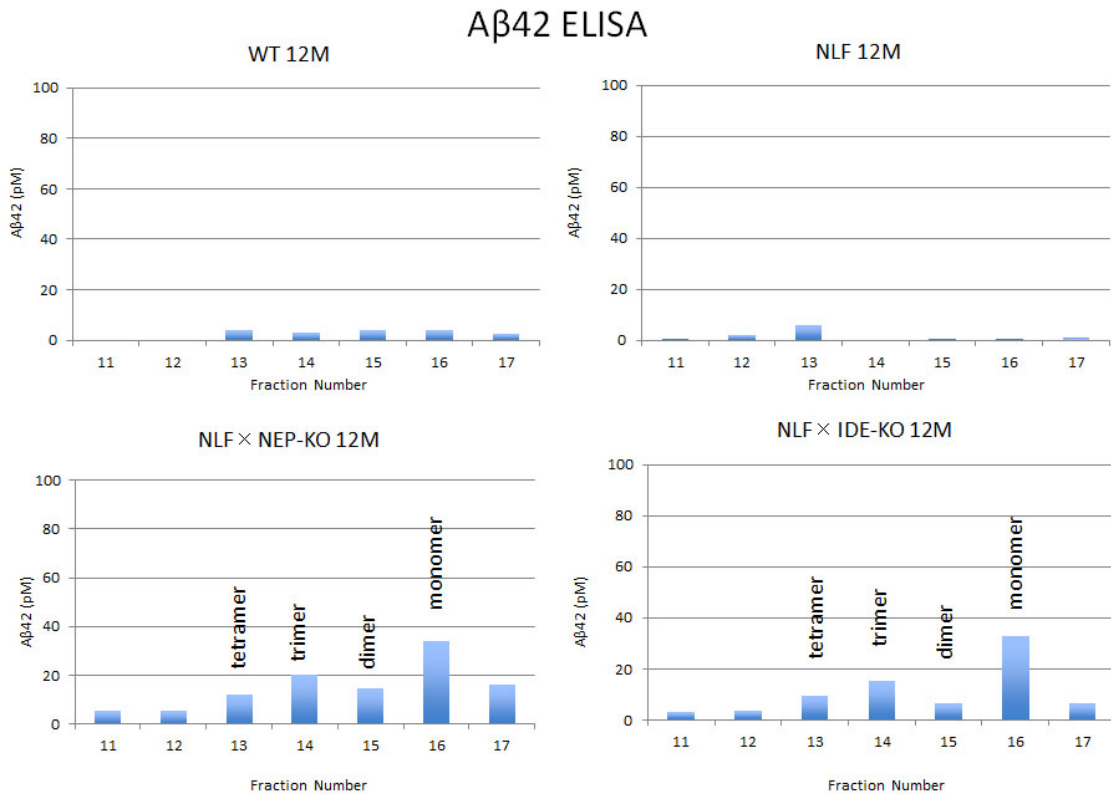

**Fig. 1S. Molecular sieving analysis of A $\beta$ <sub>42</sub> by gel filtration of TS-soluble extracts**

TS-soluble fractions from brain extracts were subjected to gel filtration analysis for detection of A $\beta$  monomer and oligomers. *App*<sup>NL-F</sup> mice deficient in NEP and IDE exhibited similar quantities of monomer and oligomers (i.e., from the dimer to tetramer). A $\beta$ <sub>40</sub> levels were below the detection limit in all fractions (data not shown).

Supplementary Figure 2.

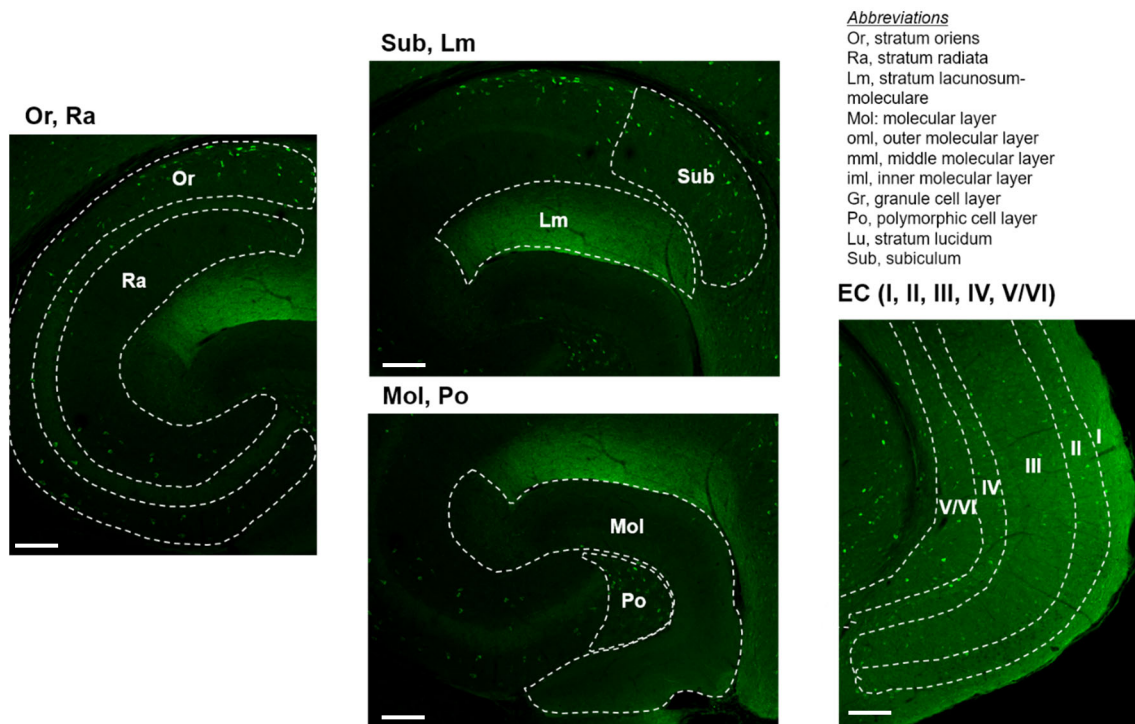

**Fig. 2S. Immunohistochemistry of somatostatin in the hippocampus**

The upper right panel defines abbreviations used in the images. The specificity of immunostaining was confirmed using mice deficient in somatostatin precursor as a negative control. The scale bar indicates 100  $\mu\text{m}$ .

Supplementary Figure 3.

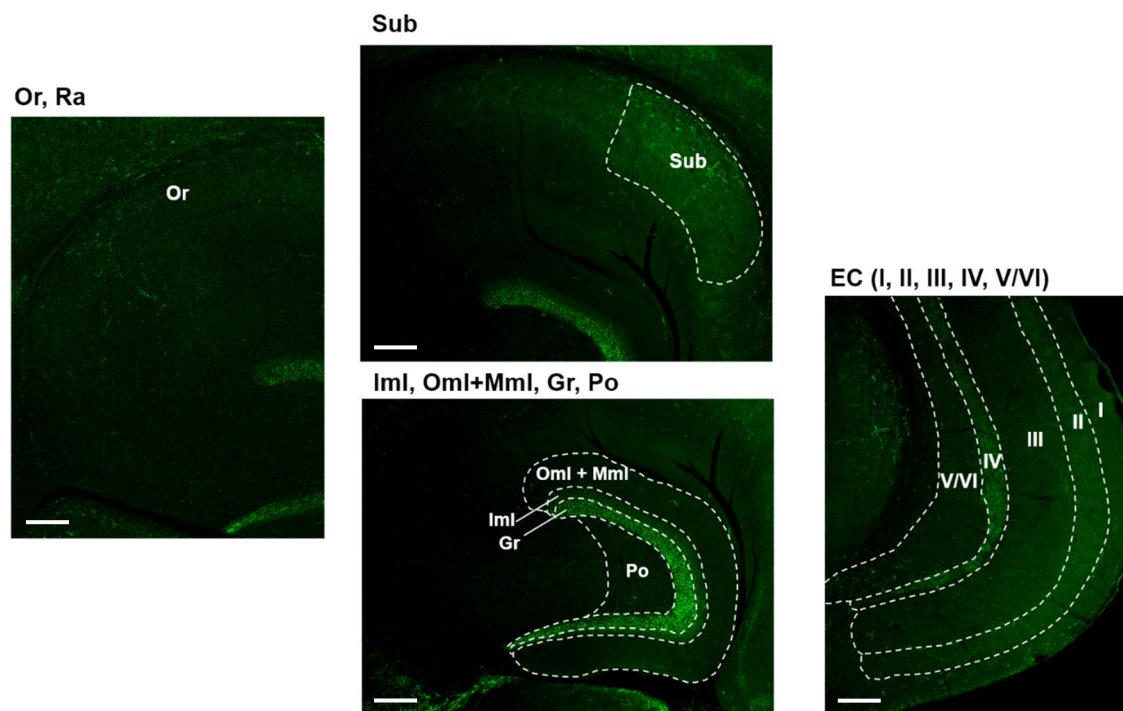

**Fig. 3S. Immunohistochemistry of substance P in the hippocampus**

Abbreviations used in the images are defined in Fig. 2S. The scale bar indicates 100  $\mu$ m.

Supplementary Figure 4.

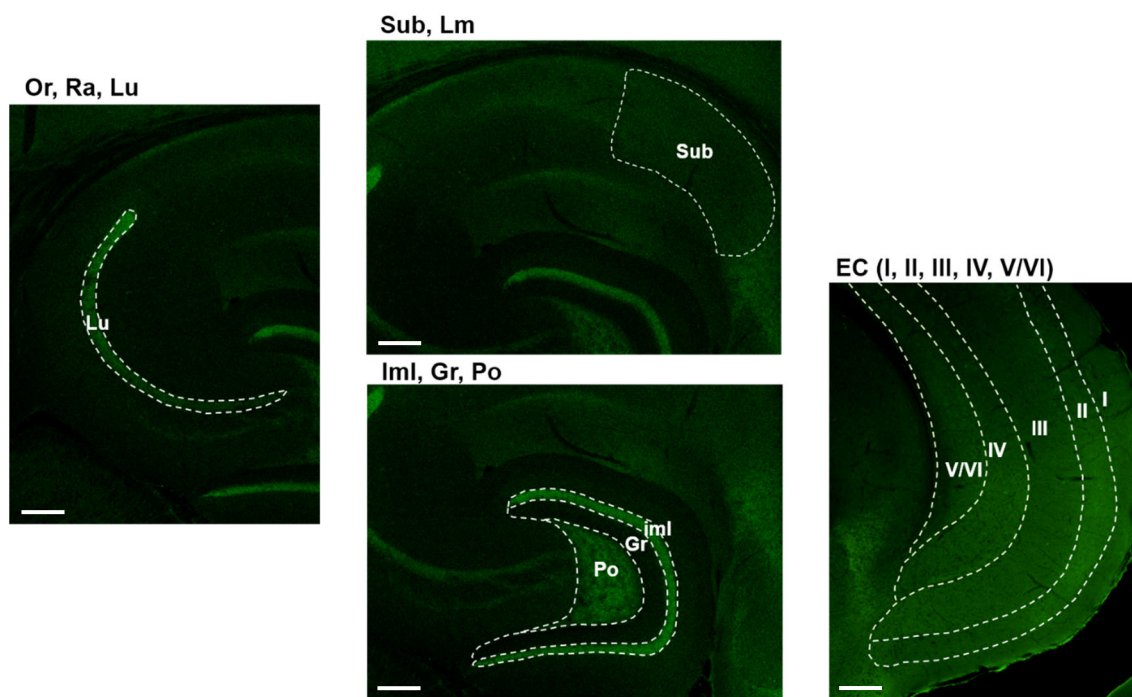

**Fig. 4S. Immunohistochemistry of cholecystinin in the hippocampus**

Abbreviations used in the images are defined in Fig. 2S. The scale bar indicates 100 μm.

Supplementary Figure 5

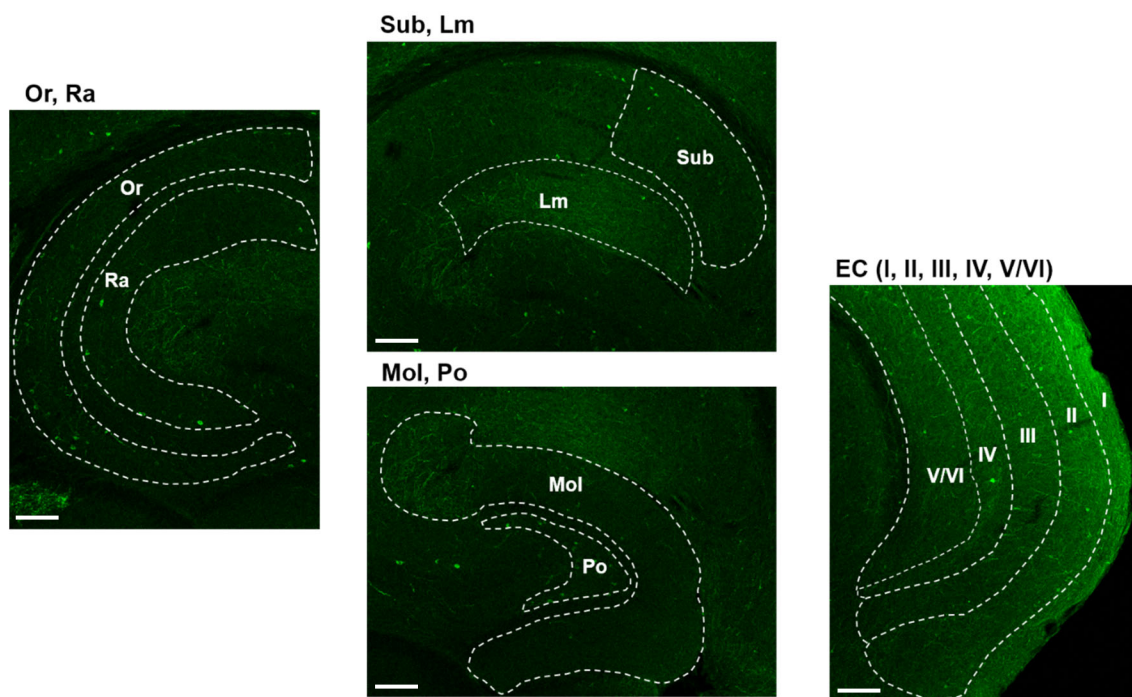

**Fig. 5S. Immunohistochemistry of neuropeptide Y in the hippocampus**

Abbreviations used in the images are defined in Fig. 2S. The scale bar indicates 100  $\mu$ m.

Supplementary Figure 6

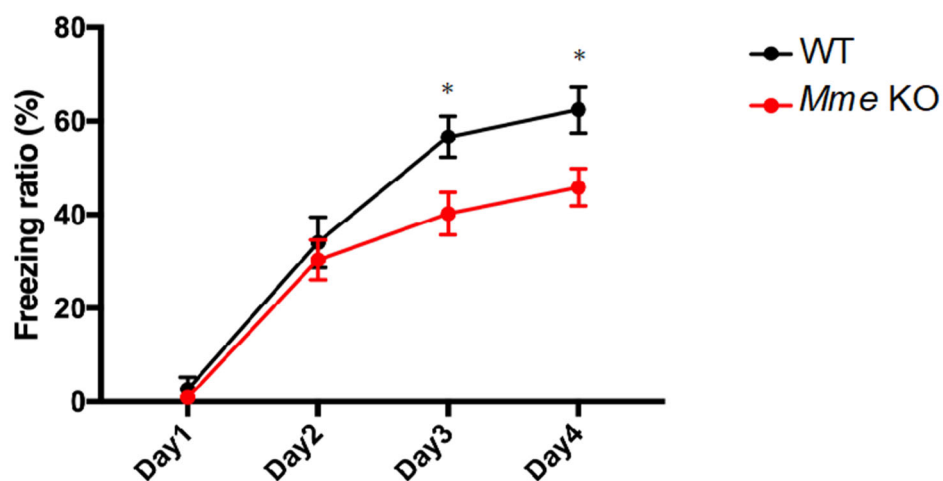

**Fig. 6S. Memory impairment in single NEP (*Mme*) KO mice as analyzed by fear conditioning.** Freezing ratio of 6-month-old WT and NEP-KO mice. The data represent the mean  $\pm$ SEM. Results were analyzed by two-way ANOVA followed by Bonferroni's multiple comparison test ( $n = 8$  for each group).

## Supplementary Methods

### *Gel filtration.*

TS-soluble fractions of mouse cerebral cortex (10.6mg) were applied to a gel filtration column (TSK gel G2000SWXL, 7.8×300mm) (TOSOH, Tokyo, Japan) equilibrated with buffer A (50% acetonitrile-0.1% trifluoroacetic acid). The adsorbed material was eluted with buffer A at a flow rate of 1ml/min at 40°C. Fractions (500µl) were pooled, lyophilized, and subjected to ELISA for Aβ<sub>40</sub> and Aβ<sub>42</sub> quantification. The elution volumes of Aβ monomer and oligomers were determined using a monomer and oligomers generated from synthetic Aβ. Aβ<sub>42</sub> (PEPTIDE INSTITUTE. INC., Osaka, Japan) (2mg/ml DMSO, 10µl) was added to 20mM Tris-HCl (pH 7.5, 90µl) and then incubated for 1 day at 37°C.

### *Immunohistochemical staining and image analysis of neuropeptides in WT and NEP-KO mouse hippocampi*

Male neprilysin-knockout mice/B6J (12-14 weeks of age; n=7) and wild type littermates (n=8) were used. The mice were anesthetized deeply and perfused transcardially with 0.1 M PBS (pH 7.4), followed by ice-cold Zamboni's fixative (+1.5% glutaraldehyde). Brains were removed and immersed in the same fixative at 4°C overnight. Horizontal sections (40 µm thick) were prepared using a vibrating blade microtome (VT1000 S vibratome, Leica Biosystems), and were immunostained floating in the primary antibody solution for overnight. Primary antibodies against neuropeptides and secondary antibodies used were as follows<sup>1-4</sup>: anti-somatostatin-14 (rabbit polyclonal, 1:4000 dilution, Peninsula Laboratories Cat# T-4103.0050, RRID:AB\_518614), anti-substance P (rat monoclonal, 1:50 dilution, Millipore Cat# MAB356, RRID:AB\_94639), anti-neuropeptide Y (rabbit polyclonal, 1:6000 dilution, Sigma-Aldrich Cat# N9528, RRID:AB\_260814), anti-cholecystokinin 8 (rabbit polyclonal, #20078 1:6000 dilution, Diasorin, Stillwater, MN), AlexaFluor 488-conjugated anti-mouse and anti-rat antibody (1:500 dilution, Thermo Fisher Scientific Cat# A-11034, RRID:AB\_2576217, Thermo Fisher Scientific Cat# A-11006, RRID:AB\_2534074). Confocal images were acquired by a triple scan protocol with an IX70 inverted microscope incorporating an FV300 confocal laser scanning system. The densities of immunoreactivity to each antibody in grid areas of the hippocampal formation and entorhinal cortex were measured using MetaMorph, ver. 7.7 (Molecular Devices). To reduce the variance of tissue sections, we used the average of data from 9-10 tissue sections per mouse as an individual value. In addition, each set of experiments was repeated at least twice to confirm the results.

*Note.* Changes in levels of Met-Enkephalin, Leu-Enkephalin, CRF (Corticotropin-releasing factor), Neurotensin B and other neuropeptides were not examined because of their low expression levels in the hippocampal formation and entorhinal cortex.



### *Statistical analysis.*

All data for immunohistochemical images were expressed as means  $\pm$  s.e.m. For comparisons of the means between two groups, statistical analysis was performed by applying Student's *t* test after confirming equality of variances of the groups. If the variances were unequal, a Mann-Whitney *U*-test was performed (SigmaPlot software, ver.14, Systat Software Inc).

### *Examination of memory impairment by fear conditioning*

We performed the memory impairment examination as previously described<sup>5</sup>. Before the start of test, mice were put in a white noise box for at least 1 hour. Subsequently, the mice were placed into a sound-attenuating chamber and allowed to explore the chamber for 5 minutes. The percent freezing time was measured until mice received an electric shock (7.5mA) to the foot after 4 minutes. As a long-term retention test, the same conditioning experiments were repeated daily for 4 days. The training box was cleaned with water and wiped dry with paper toweling before the next mouse was placed in the chamber. Mice were returned to their cages and provided with free access to food and water.

## **References**

- 1 Hökfelt, T. *et al.* Neuropeptides--an overview. *Neuropharmacology* **39**, 1337-1356, doi:10.1016/s0028-3908(00)00010-1 (2000).
- 2 Petersson, S., Lavebratt, C., Schalling, M. & Hökfelt, T. Expression of cholecystokinin, enkephalin, galanin and neuropeptide Y is markedly changed in the brain of the megencephaly mouse. *Neuroscience* **100**, 297-317, doi:10.1016/s0306-4522(00)00285-2 (2000).
- 3 Diez, M., Koistinaho, J., Kahn, K., Games, D. & Hökfelt, T. Neuropeptides in hippocampus and cortex in transgenic mice overexpressing V717F beta-amyloid precursor protein--initial observations. *Neuroscience* **100**, 259-286, doi:10.1016/s0306-4522(00)00261-x (2000).
- 4 Saito, T. *et al.* Somatostatin regulates brain amyloid beta peptide A beta(42) through modulation of proteolytic degradation. *Nature medicine* **11**, 434-439, doi:10.1038/nm1206 (2005).
- 5 Anagnostaras, S. G. *et al.* Selective cognitive dysfunction in acetylcholine M1 muscarinic receptor mutant mice. *Nat Neurosci* **6**, 51-58, doi:10.1038/nn992 (2003).
